# Supplementary material for: Adsorption and diffusion of hydrogen and oxygen in FCC-Co: a first-principles study
Source: Royal Society of Chemistry journal article supplement (doi:10.1039/c7cp07208b), 2017-01-01
Supplement: c7cp07208b1.pdf [file c7cp07208b1.pdf]

# **Adsorption and diffusion of hydrogen and oxygen in FCC-Co: a first-principles study**

Wusong Liu<sup>1</sup>, Naihua Miao<sup>1,2\*</sup>, Linggang Zhu<sup>1,2</sup>, Jian Zhou<sup>1\*</sup>, Zhimei Sun<sup>1,2</sup>

<sup>1</sup>School of Materials Science and Engineering, Beihang University, Beijing 100191, China

<sup>2</sup>Center for Integrated Computational Materials Engineering, International Research Institute for Multidisciplinary Science, Beihang University, Beijing 100191, China

\*Correspondence and requests for materials should be addressed to N.H. Miao or J. Zhou:

[nhmiao@buaa.edu.cn](mailto:nhmiao@buaa.edu.cn), [jzhou@buaa.edu.cn](mailto:jzhou@buaa.edu.cn).

## Supporting Information

Table S1. Energy barrier  $E_a$  and diffusion prefactor  $D_0$  of hydrogen and oxygen diffusion in Co and Ni derived from different computational methods and in comparison with available experimental data.

| Diffusion Type | Method                                             | Energy barrier (eV) | Diffusion prefactor (m <sup>2</sup> /s) |
|----------------|----------------------------------------------------|---------------------|-----------------------------------------|
| H in Co        | GGA (this work)                                    | 0.47                | $3.05 \times 10^{-6}$                   |
|                | LDA (this work)                                    | 0.55                | $3.21 \times 10^{-6}$                   |
|                | Exp. (Caskey et al. 1974) <sup>a</sup>             | 0.51                | $8.30 \times 10^{-7}$                   |
| H in Ni        | <i>Ab initio</i> (Wimmer et al. 2008) <sup>b</sup> | 0.47                | $3.84 \times 10^{-6}$                   |
|                | Exp. (Völkl et al. 1978) <sup>c</sup>              | 0.42                | $6.90 \times 10^{-7}$                   |
| O in Co        | GGA (this work)                                    | 1.03                | $1.29 \times 10^{-6}$                   |
|                | LDA (this work)                                    | 1.17                | $1.34 \times 10^{-6}$                   |
| O in Ni        | DFT-Phonon (Fang et al. 2014) <sup>d</sup>         | 0.92                | $8.00 \times 10^{-6}$                   |
|                | Exp. (Zholobov et al. 1971) <sup>e</sup>           | 2.49                | $1.21 \times 10^{-3}$                   |
|                | Exp.2 (Park et al. 1987) <sup>f</sup>              | 1.70                | $4.90 \times 10^{-6}$                   |

<sup>a</sup>G. Caskey, R. Derrick and M. Louthan, *Scripta Metal*, 1974, **8**, 481-486.

<sup>b</sup>E. Wimmer, W. Wolf, J. Sticht, P. Saxe, C. B. Geller, R. Najafabadi and G. A. Young, *Phys Rev B*, 2008, **77**, 134305.

<sup>c</sup>J. Völkl and G. Alefeld, *Diffusion of hydrogen in metals*, Springer Berlin Heidelberg 1978.

<sup>d</sup>H. Z. Fang, S. L. Shang, Y. Wang, Z. K. Liu, D. Alfonso, D. E. Alman, Y. K. Shin, C. Y. Zou, A. C. T. van Duin, Y. K. Lei and G. F. Wang, *J Appl Phys*, 2014, **115**, 043501.

<sup>e</sup> S. Zholobov and M. Malev, *Zh. Tekh. Fiz.*, 1971, **41**, 677.

<sup>f</sup> J. W. Park and C. J. Altstetter, *Metallurgical Transactions A*, 1987, **18**, 43-50.
